# Supplementary material
Source: publisher site journal article supplement (https://www.spandidos-publications.com/8475/downloadSupplementary)

Figure S1. (A) After treatment with LIG concentrations from 10 to 200  $\mu\text{M}$  in TKPTs for 24 h and the cell viability was detected by Cell Counting Kit-8 assay. (B) The quantification results of Fig. 3D. (C) The quantification results of Fig. 3E. (D) The quantification results of Fig. 3F. (E) The mRNA levels of GPX4, HO-1, NQO1 and SLC7A11 in TKPTs treated with LIG (10, 20  $\mu\text{M}$ ) for 24 h were analyzed by reverse transcription-quantitative PCR. (F) The quantification results of Fig. 3G. \* $P < 0.05$ , \*\* $P < 0.01$ , \*\*\* $P < 0.001$  and \*\*\*\* $P < 0.0001$  (One-way ANOVA). LIG, ligustroflavone; TKPTs, mouse renal proximal tubular epithelial cells; GPX4, glutathione peroxidase 4; HO-1, heme oxygenase 1; SLC7A11, solute carrier family 7 member 11; NQO1, NADPH quinone oxidoreductase 1; NRF2, nuclear factor erythroid 2-related factor 2; GSK3 $\beta$ , glycogen synthase kinase 3 $\beta$ ; P-, phosphorylated; ns, no significant.

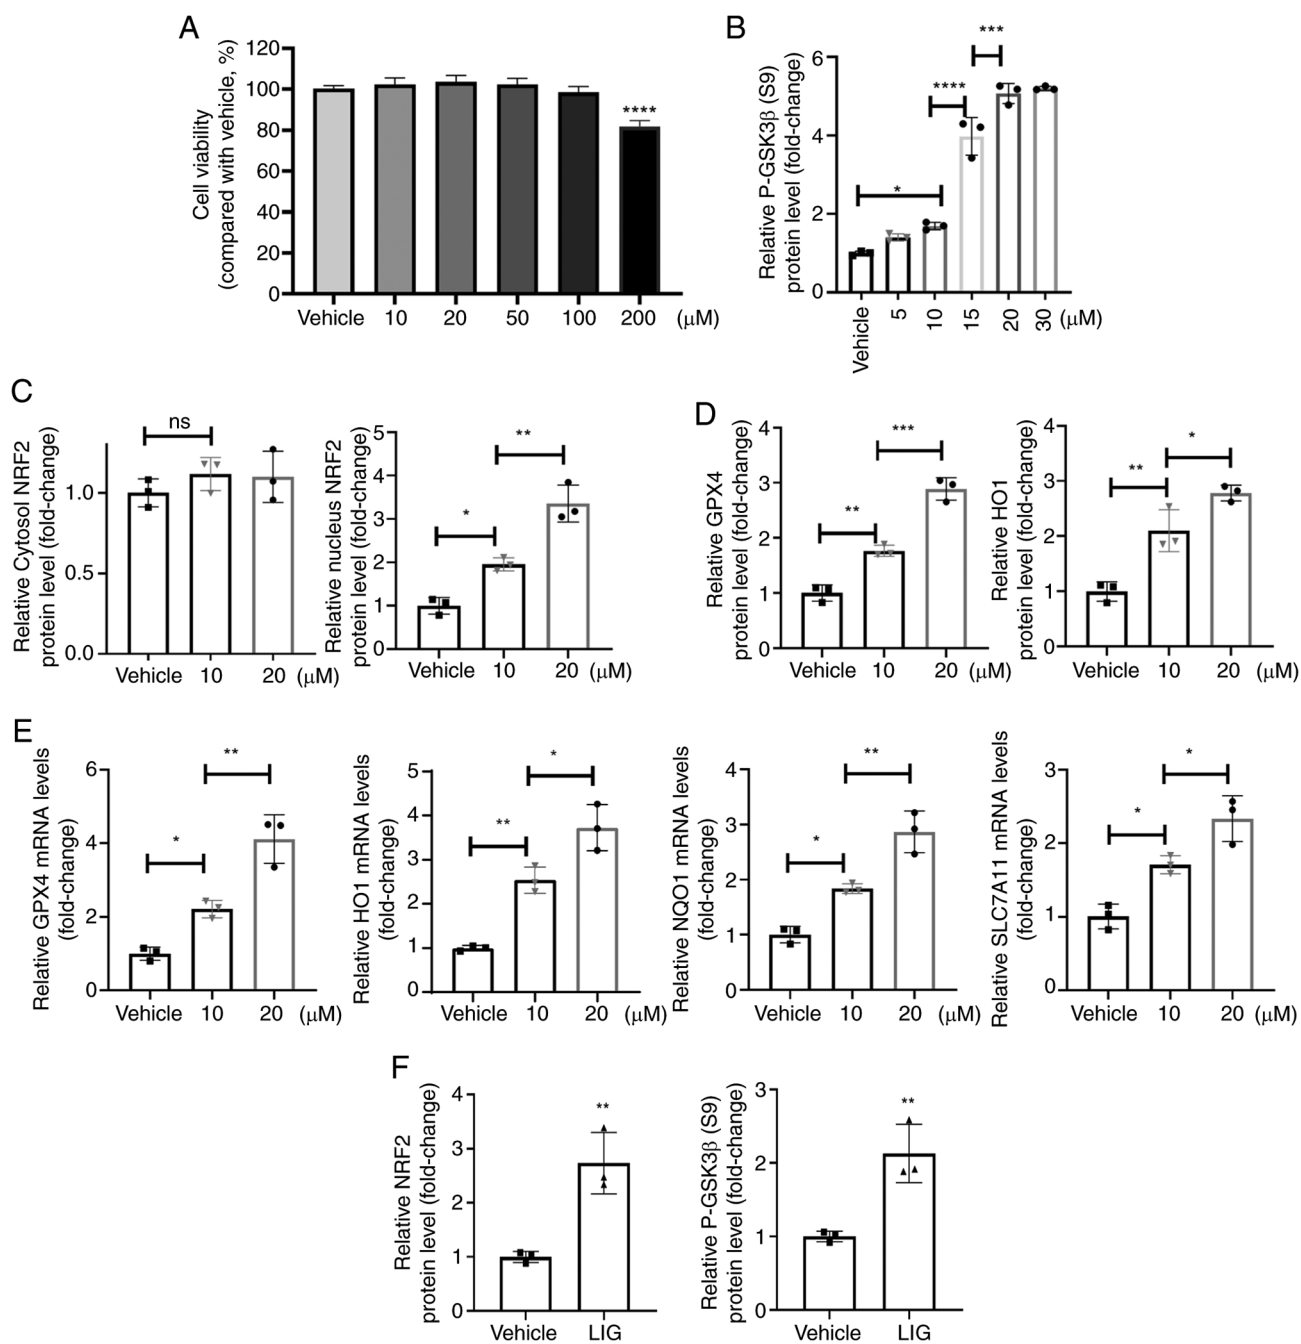

Supplement: Supplementary file 1 [file downloadSupplementary]
